# Supplementary material
Source: publisher figshare collection journal article supplement (https://asha.figshare.com/articles/dataset/_/24171087)
Supplement: Supplementary file 1 [file 1]

## Sheet: Instructions français
Supplemental material, Brisebois et al., “Adaptation and Reliability of the Cinderella Story Retell Task in Canadian French Persons Without Brain Injury,” AJSLP, https://doi.org/10.1044/2023_AJSLP-23-00101
Supplemental Material S3. MC scoring template.
It is strongly recommended to consult the following publications BEFORE performing the MCA analysis
Nicholas and Brookshire's (1995) Appendix 1 A, as well as Richardson and Dalton’s (2016) Appendices
Nicholas, L. E., & Brookshire, R. H. (1995). Presence, completeness, and accuracy of main concepts in the connected speech of non-brain-damaged adults and adults with aphasia. Journal of Speech and Hearing Research, 38(1), 145–156. https://doi.org/10.1044/jshr.3801.145
Richardson, J. D., & Dalton, S. G. H. (2016b). Main concepts for three different discourse tasks in a large non-clinical sample. Aphasiology, 30(1), 45–73. https://doi.org/10.1080/02687038.2015.1057891
AphasiaBank provides guidelines for the original version for English speakers on their website:
Richardson, J. D., & Dalton, S. G. H. (2016a). AphasiaBank | Main Concept Analysis. https://aphasia.talkbank.org/discourse/MainConcepts/
Template developed based on FOQUSAphasia Workshop on Main Concept Analysis given by Sarah Grace Dalton and Jessica D. Richardson -- from February 25, 2021
Following instructions are provided in Canadian French
Main Concept Analysis
Tout d'abord, lisez/écoutez l'histoire (l'échantillon) dans son intégralité pour vous familiariser avec la production de la personne.
Comment utiliser la feuille de calcul :
	Colonne B:	Pour chaque Main Concept (MC), saisissez l'énoncé du participant correspondant à ce concept.
	Colonne C:	Entrez le mot ou l'expression notée pour chaque élément essentiel
	Colonnes D à F:	Indiquez la précision du MC. Accurate = précis; inaccurate= imprécis, absent = absent.
		Utilisez les chiffres 0 (pas sélectionné) et 1 (sélectionné) pour compléter la grille.
	Colonnes G et H:	Indiquez la présence des éléments essentiels. Complete = présence de tous les éléments essentiels; incomplete = absence d'au moins un élément essentiel.
		Si MC absent (tous les éléments essentiels absents) = ne pas coter ce paramètre.
	Colonne I:	Inscrivez le code pour MC				Les points sont automatiquement indiqués dans la colonne J suite à la complétion de la colonne I.
		AC:	Accurate & Complete = 3 Points
		AI:	Accurate & Incomplete = 2 Points
		IC:	Inaccurate & Complete = 2 Points
		II:	Inaccurate & Incomplete = 1 Point
		AB:	Absent = 0 Points
	Des exemples de compilation sont fournis sur la feuille d'exemple.
	Les lignes 96 à 101 compilent automatiquement les codes et le score total.
NOTES IMPORTANTES
	- Ne modifiez pas la mise en page de la feuille de calcul en ajoutant des lignes ou des colonnes. Cela entraînerait une rupture des formules intégrées dans la feuille de calcul. Si la feuille de calcul ne fonctionne pas correctement, veuillez télécharger une nouvelle copie.
	Si cela ne fonctionne pas, veuillez contacter Amélie Brisebois,						amelie.brisebois@umontreal.ca

## Sheet: Exemples de cotation
			Précision des éléments			Présence ou non des éléments
Main Concept	Participant Production (si désiré)	Essential Elements	Accurate	Inaccurate	Absent	Complete	Incomplete	Code	Score
1. Le père marie une femme avec deux filles.	&euh donc l'histoire de Cendrillon <c'est &euh c'est une> [/] c'est une jeune fille <qui> [/] qui a perdu sa mère, qui vit avec son père et son père s'est remarié. &euh donc &euh la nouvelle femme de son père, c'est la belle mère de Cendrillon et elle elle a deu1 filles.	Le père (papa)	1			1		AC	3
		Marie (s'est marié à, s'est remarié à, s'est marié à nouveau)	1
		Une femme (une dame)	1
2. Cendrillon vit avec sa belle-mère/ses belles-sœurs.	c'est une jeune fille <qui> [/] qui a perdu sa mère qui vit avec son père et son père s'est remarié. *PAR: &euh donc la nouvelle femme de son père c'est la belle+mère de Cendrillon. *PAR: et elle elle a deux filles. *PAR: donc &euh le père c'est ça donc se remarie donc la belle+mère arrive à la maison avec les deux filles et lui présente Cendrillon ses deux demi+soeurs si on veut.	Cendrillon (elle)	1			1		AC	3
		Vit avec (reste avec, s'installe avec, grandit avec, a)	1
		Sa belle-mère/ses belles-sœurs (famille recomposée, nouvelle famille, les femmes, elles)	1
3. La belle-mère et les demi-sœurs étaient méchantes avec Cendrillon.	&euh fait_qu' elle est un peu maltraitée par la belle+mère et par <les deux soeurs> [//] ses deux demi+soeurs aussi.	La belle-mère et les demi-sœurs (famille recomposée, nouvelle famille, les femmes, elles)	1			1		AC	3
		Étaient méchantes (étaient cruelles, étaient méchantes, traitaient mal Cendrillon, étaient affreuses, détestées)	1
		Avec Cendrillon (avec elle)	1
4. Cendrillon était la servante de la belle-mère et des demi-sœurs.	et &euh <elle demande à Cendrillon> [//] elle la traite un petit peu comme la servante si on veut.	Cendrillon (elle)	1			1		AC	3
		était (était forcée d'être, devait être)	1
		La servante (esclave, domestique)	1
5. Cendrillon doit faire le ménage.	donc elle doit faire le ménage la vaiselle ces choses-là récurer les planchers et tout	Cendrillon (elle)	1					AC	3
		Doit (est forcée de faire, doit faire, doit s'occuper de)	1			1
		Le ménage(les corvées, le nettoyage, s'occuper de la maison, tout)	1
6. Le roi pense que le prince devrait se marier.		Le prince (il)			1		1	AB	0
		Devrait se marier (doit se marier/doit trouver une femme)			1
7. Le roi annonce qu'il va y avoir un bal en l'honneur de son fils qui doit trouver une épouse.	et un jour &euh le prince décide de faire un bal et invite toutes les jeunes filles du royaume à participer à son bal.	Il va y avoir (organise, fait)	1			1		AC	3
		Un bal (danse, une grande fête, célébration, gala)	1
8. Elles ont eu une invitation au bal.	donc la belle mère reçoit <la la> [//] l'invitation et dit à ses deu1 filles naturellement que elles sont invitées au bal.	Elles (les femmes, la belle-mère et/ou les demi-sœurs et/ou Cendrillon, tous les membres de la famille, la famille)	1			1		AC	3
		Ont reçu (reçu, a été livré [si l'ordre des mots est modifié pour que l'invitation soit livrée au1 femmes])	1
		Une invitation *au bal* (aucune alternative pour « invitation »)	1
9. Elles sont e1citées à l'idée d'aller au bal.		Elles (les femmes, la belle-mère et/ou les demi-sœurs et/ou Cendrillon, tous les membres de la famille, la famille)			1		1	AB	0
		Sont e1citées *à l'idée d'aller au bal* (sont heureuses, sont contentes)			1
10. La belle-mère dit à Cendrillon qu'elle ne peut pas aller au bal à moins que/parce que *insérer la raison*	&euh et je crois que la belle+mère lui dit b(i)en &euh tu pourras y aller si tu arrives à faire toutes tes tâches &+d &+a [ *d] habituelles et de te faire une robe	Cendrillon (elle)	1			1		AC	3
		Ne peut pas aller *au bal* (ne peut pas y aller, doit rester à la maison, n'a pas le droit d'y aller)	1
11. Les demi-sœurs abîment la robe de Cendrillon.	et là <les soeurs> [//] les demi+soeurs sont jalouses et lui déchirent sa robe.	Les demi-sœurs (elles)	1			1		AC	3
		Abîment (ruinent, détruisent, arrachent, déchirent)	1
		La robe de Cendrillon (sa robe)	1
12. La belle-mère et les belles-sœurs sont allées au bal.	<les deu1 jeunes femmes les deu1 jeunes filles> [//] ses demi+soeurs partent au bal.	La belle-mère et les belles-sœurs (tout le monde sauf Cendrillon)	1			1		AC	3
		Sont allées *au bal* (partent, quittent d'en vont)	1
13. Cendrillon était triste.	<et &euh> [/] et comme elle pleure beaucoup sa marraine arrive et &euh.	Cendrillon (elle)	1			1		AC	3
		Était (est)	1
		Triste (triste, déçue, malheureuse, *pleure*)	1
14. Une fée marraine est apparue à Cendrillon.	<et &euh> [/] et comme elle pleure beaucoup sa marraine arrive et &euh.	Une fée marraine (aucune alternative pour « fée marraine »)		1		1		IC	2
		Est apparue (apparaît, surprend, vient, arrive)	1
15. La fée marraine fait en sorte que {éléments} se transforment en {éléments}.	elle prend une citrouille elle transforme en carosse. <elle prend> [/] elle prend je crois les p(e)tites souris et les transforme en cocher et &euh et le cheval qui. +//	La fée marraine (aucune alternative pour « fée marraine »)		1		1		IC	2
		Fait en sorte que (transforme, crée, change, tout autre verbe impliquant une transformation)	1
		Citrouille en carosse (+souris) OU Souris en chevau1 (+carosse)	1
16. La fée marraine fait de Cendrillon une belle princesse.	elle l'habille avec <son sa sa> [//] sa formule magique elle l'habille.	La fée marraine (aucune alternative pour « fée marraine »)		1		1		II	1
		Fait de (transforme, crée, change, donne)	1
		Cendrillon (la fille ordinaire, ses vêtements ordinaires)	1
		Une belle princesse (robe/chaussures EN robe de bal/chaussons, belle)			1
17. Cendrillon est allée au bal en carosse.	donc elle part au bal dans le beau carosse etcetera	Cendrillon (elle)	1			1		AC	3
		Est allée (va, arrive)	1
		Au bal (danse, grande fête, célébration, gala)	1
18. Elle savait qu'elle devait être à la maison parce que tout va se retransformer à minuit.	fait_qu' elle lui dit &euh n'oublie pas faut que tu reviennes avant minuit sinon &euh <tout> [//] toute le charme <va va> [/] va se défaire et &+s [ *d] ton carosse <va &+retou> [/] va retourner en citrouille.	Elle (Cendrillon)	1			1		AC	3
		Devait être (doit être, doit revenir)	1
		À la maison à minuit (partir avant minuit)	1
19. Le prince et Cendrillon ont dansé dans la salle/toute la nuit/sans personne d'autre.	p(u)is là elle danse une partie de la nuit avec le prince etcetera etcetera.	Le prince et Cendrillon (ils)	1			1		AC	3
		Ont dansé (dansaient, continuaient à danser)	1
20. Le prince tombe amoureu1 de Cendrillon.		Le prince (il)			1		1	AB	0
		Tombe amoureu1 (est amoureu1 de, est impressionné par, aime)			1
		De Cendrillon (elle)			1
21. Cendrillon a réalisé qu'il est minuit.	et là on voit l'horloge le coup de minuit &euh.	Il (l'horloge, quelque chose indique qu'il)	1			1		AC	3
		Est (devient, sonne, frappe)	1
		Minuit (douze heures, minuit, presque minuit, les douze coups de minuit)	1
22. Elle a descendu les escaliers.	elle part à courir <et et là> [//] ah oui elle a des souliers des pantoufles de verre donc <e(lle)> [/] elle en échappe un avant de partir.	Elle (Cendrillon)	1				1	AI	2
		A descendu (courait, se précipitait, sprintait, quittait, partait)	1
		Les escaliers (hors du bal/château, loin du bal/château/prince)			1
23. En courant dans les escaliers, elle a perdu une de ses pantoufles de verre.	elle part à courir <et et là> [//] ah oui elle a des souliers des pantoufles de verre donc <e(lle)> [/] elle en échappe un avant de partir.	Elle (Cendrillon)	1			1		AC	3
		A perdu (laisse)	1
		Une de ses pantoufles de verre (chaussure, chaussure de verre)	1
24. Le prince trouve la chaussure de Cendrillon.		Le prince (tout autre personnage royal, roi, serviteur, duc, premier ministre, chambellan, majordome)			1		1	AB	0
		Trouve (avait, a eu, a récupéré, a été apporté)			1
		La chaussure de Cendrillon (chaussure/pantoufle de verre)			1
25. Tout retourne à sa forme originale.	rendue à la maison, &+pouf elle tombe comme assis à côté d'une citrouille et bon. <les les> [/] les cochers se retrouvent en petites souris etcetera.	Tout (la citrouille, la souris, et/ou les vêtements, la robe)	1			1		AC	3
		Retourne (revient, disparaït)	1
		À sa forme originale (devient normal [peut préciser ce en quoi il redevient])	1
26. Elle est rentrée à la maison à temps.	elle s'en va dans son carosse rentre à la maison. rendue à la maison, &+pouf elle tombe comme assis à côté d'une citrouille et bon.	Elle (Cendrillon)	1			1		AC	3
		Est rentrée (arrive, va)	1
		À la maison (chez elle)	1
27. Le prince fait du porte à porte pour trouver Cendrillon	et le lendemain en fait le prince a demandé &euh de retrouver la jeune fille <qui qui> [//] avec qui <le le le> [/] le soulier va fitter dans le pied dans_le_fond	Le prince (tout autre personnage royal, roi, serviteur, duc, premier ministre, chambellan, majordome)	1			1		AC	3
		Fait du porte à porte (essayait de trouver, cherchait)	1
		Pour Cendrillon (la personne à qui ferait la pantoufle de verre, la fille du bal)	1
28. Le prince vient à la maison de Cendrillon.		Le prince (tout autre personnage royal, roi, serviteur, duc, premier ministre, chambellan, majordome)			1		1	AB	0
		Vient (arrive à, est allé, a trouvé, se présente à)			1
		La maison de Cendrillon (sa maison)			1
29. Les demi-sœurs essayent la pantoufle de verre.	les gens arrivent essaient les souliers au1 deu1 demi+soeurs.	Les demi-sœurs (les demi-sœurs et la belle-mère, les autres filles [si la référence au1 demi-sœurs est claire])	1			1		AC	3	Le sujet n'est pas les demi-sœurs, mais je trouve que ça revient au même
		Essayent (tentent d'enfiler, mettent le pied dedans)	1
		La pantoufle de verre (chaussure, chaussure de verre)	1
30. La pantoufle ne faisait pas aux demi-sœurs.	les gens arrivent essaient les souliers au1 deu1 demi+soeurs. naturellement ça rentre pas les pieds sont trop gros.	La pantoufle (chaussure/pantoufle de verre)	1			1		AC	3
		Ne faisait pas (n'allait pas sur les pieds de, ne convenait pas à)	1
		Au1 demi-sœurs (les demi-sœurs et la belle-mère, les autres filles [si la référence au1 demi-sœurs est claire])	1
31. Il a mis la pantoufle au pied de Cendrillon.		Il (tout autre personnage royal, roi, serviteur, duc, premier ministre, chambellan, majordome)			1		1	AB	0
		A mis (essayé, glissé, placé)			1
		La pantoufle *au pied de Cendrillon* (chaussure/pantoufle de verre)			1
32. La pantoufle convient parfaitement à Cendrillon.	donc le pied de Cendrillon qui rentre dans le soulier de verre.	La pantoufle (chaussure/pantoufle de verre)	1			1		AC	3
		Convient parfaitement (appartenait à)	1
33. Cendrillon et le prince se sont mariés.	et finalement b(i)en Cendrillon retrouve son prince et se marie.	Cendrillon et le prince (ils)	1			1		AC	3
		Se sont mariés (ont été mariés, ont eu un mariage, ont eu une célébration de mariage)	1
34. Cendrillon et le prince vécurent heureux pour toujours.	et finalement b(i)en Cendrillon retrouve son prince et se marie. et probablement eurent beaucoup d'enfants.	Cendrillon et le prince (ils)	1				1	AI	2
		Vécurent heureux pour toujours (vivaient pour toujours, vivaient pour longtemps, étaient heureux pour la vie)	1
								Score total	78
								Nombre de AC	23
								Nombre de AI	2
								Nombre de IC	2
								Nombre de II	1
								Nombre de AB	6

## Sheet: Modèle à copier
			Précision des éléments			Présence ou non des éléments
Main Concept	Production (si désiré)	Éléments essentiels	Accurate	Inaccurate	Absent	Complete	Incomplete	Code	Score
1. Le père marie une femme avec deu1 filles.		Le père (papa)							#N/A
		Marie (s'est marié à, s'est remarié à, s'est marié à nouveau)
		Une femme (une dame)
2. Cendrillon vit avec sa belle-mère/ses belles-sœurs.		Cendrillon (elle)							#N/A
		Vit avec (reste avec, s'installe avec, grandit avec, a)
		Sa belle-mère/ses belles-sœurs (famille recomposée, nouvelle famille, les femmes, elles)
3. La belle-mère et les demi-sœurs étaient méchantes avec Cendrillon.		La belle-mère et les demi-sœurs (famille recomposée, nouvelle famille, les femmes, elles)							#N/A
		Étaient méchantes (étaient cruelles, étaient méchantes, traitaient mal Cendrillon, étaient affreuses, détestées)
		Avec Cendrillon (avec elle)
4. Cendrillon était la servante de la belle-mère et des demi-sœurs.		Cendrillon (elle)							#N/A
		était (était forcée d'être, devait être)
		La servante (esclave, domestique)
5. Cendrillon doit faire le ménage.		Cendrillon (elle)							#N/A
		Doit (est forcée de faire, doit faire, doit s'occuper de)
		Le ménage(les corvées, le nettoyage, s'occuper de la maison, tout)								0
6. Le roi pense que le prince devrait se marier.		Le prince (il)							#N/A
		Devrait se marier (doit se marier/doit trouver une femme)
7. Le roi annonce qu'il va y avoir un bal en l'honneur de son fils qui doit trouver une épouse.		Il va y avoir (organise, fait)							#N/A
		Un bal (danse, une grande fête, célébration, gala)
8. Elles ont eu une invitation au bal.		Elles (les femmes, la belle-mère et/ou les demi-sœurs et/ou Cendrillon, tous les membres de la famille, la famille)							#N/A
		Ont reçu (reçu, a été livré [si l'ordre des mots est modifié pour que l'invitation soit livrée au1 femmes])
		Une invitation *au bal* (aucune alternative pour « invitation »)
9. Elles sont excitées à l'idée d'aller au bal.		Elles (les femmes, la belle-mère et/ou les demi-sœurs et/ou Cendrillon, tous les membres de la famille, la famille)						AB	0
		Sont e1citées *à l'idée d'aller au bal* (sont heureuses, sont contentes)
10. La belle-mère dit à Cendrillon qu'elle ne peut pas aller au bal à moins que/parce que *insérer la raison*		Cendrillon (elle)							#N/A
		Ne peut pas aller *au bal* (ne peut pas y aller, doit rester à la maison, n'a pas le droit d'y aller)
11. Les demi-sœurs abîment la robe de Cendrillon.		Les demi-sœurs (elles)						AB	0
		Abîment (ruinent, détruisent, arrachent, déchirent)
		La robe de Cendrillon (sa robe)
12. La belle-mère et les belles-sœurs sont allées au bal.		La belle-mère et les belles-sœurs (tout le monde sauf Cendrillon)						AB	0
		Sont allées *au bal* (partent, quittent d'en vont)
13. Cendrillon était triste.		Cendrillon (elle)							#N/A
		Était (est)
		Triste (triste, déçue, malheureuse, *pleure*)
14. Une fée marraine est apparue à Cendrillon.		Une fée marraine (aucune alternative pour « fée marraine »)							#N/A
		Est apparue (apparaît, surprend, vient, arrive)
15. La fée marraine fait en sorte que {éléments} se transforment en {éléments}.		La fée marraine (aucune alternative pour « fée marraine »)							#N/A
		Fait en sorte que (transforme, crée, change, tout autre verbe impliquant une transformation)
		Citrouille en carosse (+souris) OU Souris en chevau1 (+carosse)
16. La fée marraine fait de Cendrillon une belle princesse.		La fée marraine (aucune alternative pour « fée marraine »)							#N/A
		Fait de (transforme, crée, change, donne)
		Cendrillon (la fille ordinaire, ses vêtements ordinaires)
		Une belle princesse (robe/chaussures EN robe de bal/chaussons, belle)
17. Cendrillon est allée au bal en carosse.		Cendrillon (elle)							#N/A
		Est allée (va, arrive)
		Au bal (danse, grande fête, célébration, gala)
18. Elle savait qu'elle devait être à la maison parce que tout va se retransformer à minuit.		Elle (Cendrillon)							#N/A
		Devait être (doit être, doit revenir)
		À la maison à minuit (partir avant minuit)
19. Le prince et Cendrillon ont dansé dans la salle/toute la nuit/sans personne d'autre.		Le prince et Cendrillon (ils)							#N/A
		Ont dansé (dansaient, continuaient à danser)
20. Le prince tombe amoureu1 de Cendrillon.		Le prince (il)							#N/A
		Tombe amoureu1 (est amoureu1 de, est impressionné par, aime)
		De Cendrillon (elle)
21. Cendrillon a réalisé qu'il est minuit.		Il (l'horloge, quelque chose indique qu'il)							#N/A
		Est (devient, sonne, frappe)
		Minuit (douze heures, minuit, presque minuit, les douze coups de minuit)
22. Elle a descendu les escaliers.		Elle (Cendrillon)							#N/A
		A descendu (courait, se précipitait, sprintait, quittait, partait)
		Les escaliers (hors du bal/château, loin du bal/château/prince)
23. En courant dans les escaliers, elle a perdu une de ses pantoufles de verre.		Elle (Cendrillon)							#N/A
		A perdu (laisse)
		Une de ses pantoufles de verre (chaussure, chaussure de verre)
24. Le prince trouve la chaussure de Cendrillon.		Le prince (tout autre personnage royal, roi, serviteur, duc, premier ministre, chambellan, majordome)							#N/A
		Trouve (avait, a eu, a récupéré, a été apporté)
		La chaussure de Cendrillon (chaussure/pantoufle de verre)
25. Tout retourne à sa forme originale.		Tout (la citrouille, la souris, et/ou les vêtements, la robe)							#N/A
		Retourne (revient, disparaït)
		À sa forme originale (devient normal [peut préciser ce en quoi il redevient])
26. Elle est rentrée à la maison à temps.		Elle (Cendrillon)							#N/A
		Est rentrée (arrive, va)
		À la maison (chez elle)
27. Le prince fait du porte à porte pour trouver Cendrillon		Le prince (tout autre personnage royal, roi, serviteur, duc, premier ministre, chambellan, majordome)							#N/A
		Fait du porte à porte (essayait de trouver, cherchait)
		Pour Cendrillon (la personne à qui ferait la pantoufle de verre, la fille du bal)
28. Le prince vient à la maison de Cendrillon.		Le prince (tout autre personnage royal, roi, serviteur, duc, premier ministre, chambellan, majordome)							#N/A
		Vient (arrive à, est allé, a trouvé, se présente à)
		La maison de Cendrillon (sa maison)
29. Les demi-sœurs essayent la pantoufle de verre.		Les demi-sœurs (les demi-sœurs et la belle-mère, les autres filles [si la référence au1 demi-sœurs est claire])							#N/A
		Essayent (tentent d'enfiler, mettent le pied dedans)
		La pantoufle de verre (chaussure, chaussure de verre)
30. La pantoufle ne faisait pas au1 demi-sœurs.		La pantoufle (chaussure/pantoufle de verre)							#N/A
		Ne faisait pas (n'allait pas sur les pieds de, ne convenait pas à)
		Au1 demi-sœurs (les demi-sœurs et la belle-mère, les autres filles [si la référence au1 demi-sœurs est claire])
31. Il a mis la pantoufle au pied de Cendrillon.		Il (tout autre personnage royal, roi, serviteur, duc, premier ministre, chambellan, majordome)							#N/A
		A mis (essayé, glissé, placé)
		La pantoufle *au pied de Cendrillon* (chaussure/pantoufle de verre)
32. La pantoufle convient parfaitement à Cendrillon.		La pantoufle (chaussure/pantoufle de verre)							#N/A
		Convient parfaitement (appartenait à)
33. Cendrillon et le prince se sont mariés.		Cendrillon et le prince (ils)							#N/A
		Se sont mariés (ont été mariés, ont eu un mariage, ont eu une célébration de mariage)
34. Cendrillon et le prince vécurent heureu1 pour toujours.		Cendrillon et le prince (ils)							#N/A
		Vécurent heureux pour toujours (vivaient pour toujours, vivaient pour longtemps, étaient heureux pour la vie)
								Score total	#N/A
								Nombre de AC	0
								Nombre de AI	0
								Nombre de IC	0
								Nombre de II	0
								Nombre de AB	3
