# Supplementary material
Source: publisher figshare collection journal article supplement (https://asha.figshare.com/articles/dataset/_/24171087)
Supplement: Supplementary file 2 [file 1]

**Supplemental Material S2.** CLAN commands used to extract discourse variables in the transcripts and summary of interrater reliability results.

**Table S1.** CLAN commands used to extract discourse variables in the transcripts.

| CLAN Commands              | Results                                                                                                                                                                                                                                                                                                                                                                                                                               |
|----------------------------|---------------------------------------------------------------------------------------------------------------------------------------------------------------------------------------------------------------------------------------------------------------------------------------------------------------------------------------------------------------------------------------------------------------------------------------|
| <b>mor</b>                 | <ul style="list-style-type: none"> <li>• Tag parts of speech automatically using mor script</li> </ul>                                                                                                                                                                                                                                                                                                                                |
| <b>eval +t*PAR: +u</b>     | <p>Evaluate transcripts to derive primary linguistic outcome variables</p> <ul style="list-style-type: none"> <li>• eval: evaluate microlinguistic information using the mor tier</li> <li>• +t*PAR: evaluate only the participant tier</li> <li>• +u: consolidate all files to single output</li> </ul>                                                                                                                              |
| <b>freq +t*par +d2</b>     | <p>Evaluate the occurrence of each word on the participant tier</p> <ul style="list-style-type: none"> <li>• freq: extract all the words used in the file. along with their frequency counts. and calculate all the types and tokens</li> <li>• +t*par: evaluate only the participant tier</li> </ul>                                                                                                                                 |
| <b>freq +tPAR +b10 +d3</b> | <p>Evaluate the occurrence of each word on the participant tier</p> <ul style="list-style-type: none"> <li>• freq: get a frequency count</li> <li>• +b10: calculate the lexical diversity using the Moving Average Type-Token Ratio (MATTR). This index is based on a moving window that computes TTRs for each successive window of fixed length (i.e., 10 words).</li> <li>• +d3: consolidate all files to single output</li> </ul> |

**Table S2.** Summary of interrater reliability results.

Koo and Li (2016) give the following suggestion for interpreting intraclass correlation coefficient (ICC). including confidence intervals: below .50 = poor; between .50 and .75 = moderate; between .75 and .90 = good; and above .90 = excellent.

| Measure      | Test |                      |                                             | Retest |                      |                                             |
|--------------|------|----------------------|---------------------------------------------|--------|----------------------|---------------------------------------------|
|              | ICC  | 95% CI<br>Low - High | Koo & Li (2016) ICC<br>Quality (CI Quality) | ICC    | 95% CI<br>Low - High | Koo & Li (2016) ICC<br>Quality (CI Quality) |
| MC Composite | .941 | .783 - .985          | Excellent<br>(Good - Excellent)             | .965   | .866 - .991          | Excellent<br>(Good - Excellent)             |
| AC           | .932 | .753 - .983          | Excellent<br>(Good - Excellent)             | .976   | .906 - .994          | Excellent<br>(Excellent)                    |
| AI           | .800 | .382 - .946          | Good<br>(Poor - Good)                       | .914   | .694 - .978          | Excellent<br>(Moderate - Excellent)         |
| IC           | .951 | .815 - .987          | Excellent<br>(Good - Excellent)             | .915   | .696 - .978          | Excellent<br>(Moderate - Excellent)         |
| II           | .533 | -.101 - .859         | Poor<br>(Poor)                              | 1.000  | 1.000 - 1.000        | Excellent<br>(Excellent)                    |
| AB           | .952 | .821 - .988          | Excellent<br>(Good - Excellent)             | .950   | .813 - .987          | Excellent<br>(Good - Excellent)             |

*Note.* CI = Confidence interval; MC Composite = Main Concept total composite score; AC = Accurate and Complete; AI = Accurate and Incomplete; IC = Incorrect and Complete; II = Incorrect and Incomplete; AB = Absent.
