# Supplementary material
Source: publisher figshare collection journal article supplement (https://asha.figshare.com/articles/dataset/_/24171087)
Supplement: Supplementary file 3 [file 1]

## Supplemental Material S4. Canadian French adaptation of the Main concepts for the Cinderella retell task.

Instructions are provided in Canadian French.

Les informations essentielles sont en italique et en gras. Chaque segment essentiel est numéroté (en exposant), et les productions alternatives (s'il y en a eu) sont listées par numéro en dessous. Ces productions alternatives ne sont pas destinées à être une liste exhaustive, mais représentent certaines des productions les plus courantes de l'échantillon normatif et sont incluses pour faciliter la notation. Les informations supplémentaires, mais non essentielles, souvent prononcées pour compléter le concept principal sont en caractères normaux.

- 1) <sup>1</sup>**Le père** <sup>2</sup>*marie* <sup>3</sup>**une femme** avec deux filles.
  1. **Papa/Père**
  2. **S'est marié à, s'est remarié à, s'est marié à nouveau**
  3. **Une dame**
- + 2) <sup>1</sup>**Cendrillon** <sup>2</sup>*vit avec sa* <sup>3</sup>**belle-mère/ses belles-sœurs**.
  1. **Elle\***
  2. **Reste avec, s'installe avec, grandit avec, a**
  3. **Famille recomposée, nouvelle famille, les femmes, elles\***
    - i. S'il n'y a pas de mention du mot "belle", il doit y avoir une indication claire que la belle-mère et les demi-sœurs (la dame et ses deux filles, la femme méchante et ses belles filles) constituent une unité distincte de Cendrillon.

\*Note 1 : Après l'introduction de Cendrillon dans l'histoire, "elle" est une alternative acceptable, à condition que le pronom référent soit clair.  
 \*Note 2 : Après que la belle-mère et les demi-sœurs ont été introduites dans l'histoire, "elles" est une alternative acceptable à condition que le pronom référent soit clair.
- + + 3) <sup>1</sup>**La belle-mère et les demi-sœurs** <sup>2</sup>**étaient méchantes** <sup>3</sup>**avec Cendrillon**.
  1. **Voir 2.3**
  2. **Étaient cruelles, étaient méchantes, traitaient mal Cendrillon, étaient affreuses, détestées**
- + 4) <sup>1</sup>**Cendrillon** <sup>2</sup>**était** <sup>3</sup>**la servante** de la belle-mère et des demi-sœurs\*.
  1. **Elle**
  2. **Était forcée d'être, devait être**
  3. **Servante, esclave, domestique**

\*Note : Si la phrase est prononcée d'une autre manière qui exprime la servitude, par exemple "devait servir", la phrase doit inclure la belle-mère et/ou les demi-sœurs, car le verbe nécessite un objet. Ce serait la seule fois où ces mots sont essentiels pour ce concept.
- + + 5) <sup>1</sup>**Cendrillon** <sup>2</sup>**doit faire** <sup>3</sup>**le ménage**.
  1. **Elle**

2. **Est forcée de faire, doit faire, doit s'occuper de**
3. **Les corvées, le nettoyage, s'occuper de la maison, tout.**
- † 6) Le roi pense que **<sup>1</sup>le prince <sup>2</sup>devrait se marier.**
  1. **Il\***
  2. **Doit se marier/doit trouver une femme**

\*Note : Après que le prince a été introduit dans l'histoire, "il" est une alternative acceptable tant qu'il y a un référent pronominal clair.
- †† 7) Le roi annonce **<sup>1</sup>qu'il va y avoir <sup>2</sup>un bal\*** en l'honneur de son fils qui doit trouver une épouse.
  1. **Organise, fait, donne, il y aura**
  2. **Danse, grande fête, célébration, gala**

\*Note : Parfois, ce concept a été combiné avec le concept 8 dans une déclaration telle que : "Ils ont reçu une invitation au bal que le roi organisait pour son fils." Dans ce cas, les concepts 7 et 8 doivent être pris en compte.
- † 8) **<sup>1</sup>Elles <sup>2</sup>ont eu <sup>3</sup>une invitation\* au bal\*.**
  1. **Les femmes, la belle-mère et/ou les demi-sœurs et/ou Cendrillon, tous les membres de la famille, la famille**
  2. **Avoir reçu, a été livré** (si l'ordre des mots est modifié pour que l'invitation soit livrée aux femmes)
  3. **Aucune alternative n'a été produite pour "invitation".**

\*Note 1 : Non essentiel si cela ressort clairement du contexte ou si cela a été dit précédemment ; sinon, voir la note pour le numéro 7.

\*Note 2 : Alternativement, l'énoncé pourrait être le suivant: "Elles ont été invitées au bal" ou quelque chose de similaire.
- 9) **<sup>1</sup>Elles <sup>2</sup>sont excitées** par le bal\*/à l'idée d'aller au bal\*.
  1. **Voir 8.1**
  2. **Sont heureuses, sont contentes**

\*Note 1 : Voir numéro 8, note 1.

\*Note 2 : Si l'énoncé ressemble à: "Ils attendent avec impatience", il doit inclure " le bal " car un complément est requis.
- †† 10) La belle-mère dit à **<sup>1</sup>Cendrillon** qu'elle **<sup>2</sup>ne peut pas aller** au bal\* à moins que/parce que (insérer la raison)\*.
  1. **Elle**
  2. **Ne peut pas y aller, doit rester à la maison, n'a pas le droit d'y aller**

\*Note 1 : Voir numéro 8, note 1.

\*Note 2 : Une alternative est "Si Cendrillon pouvait faire toutes ses tâches ménagères, elle pourrait aller au bal".
- 11) **<sup>1</sup>Les demi-sœurs <sup>2</sup>déchirent <sup>3</sup>la robe** de Cendrillon.
  1. **Elles**
  2. **Ruinent, détruisent, arrachent, abîment**
  3. **Sa robe**
- 12) **<sup>1</sup>La belle-mère et les belles-sœurs <sup>2</sup>sont allées** au bal\*.
  1. **Tout le monde sauf Cendrillon**

i. Si la phrase est "Elles sont allées au bal", le "elles" doit clairement exclure Cendrillon dans le contexte.

2. ***Partent, quittent, s'en vont***

\*Note : Voir numéro 8, note 1.

13) ***<sup>1</sup>Cendrillon <sup>2</sup>était <sup>3</sup>triste.***

1. ***Elle***

2. ***Est\****

3. ***Pleure, est triste, déçue, malheureuse***

\*Note : Si l'énoncé est « Cendrillon pleure », accorder l'ensemble des points.

†† 14) ***<sup>1</sup>Une marraine fée <sup>2</sup>est apparue à Cendrillon.***

1. ***Aucune alternative pour "fée marraine" n'a été produite***

2. ***Apparaît, surprend, vient, arrive***

i. Si l'énoncé est "Cendrillon voit" ou "rencontre" ou "trouve", auquel cas Cendrillon devient alors un élément essentiel.

†† 15) ***<sup>1</sup>La fée marraine <sup>2</sup>fait en sorte que <sup>3</sup>{élément(s)} se transforme(nt) en {éléments}.***

1. ***Voir 14.1***

2. ***Transforme, crée, change, tout autre verbe indiquant une transformation/création.***

i. ***Doit être un verbe qui indique une sorte de transformation ou de création***

3. ***Citrouille et souris OU voiture/carrosse et chevaux***

i. ***Lors de la production de ce concept, une seule paire doit être mentionnée, mais elle doit être correctement associée pour obtenir un crédit complet.***

a. ***Citrouille à voiture/carrosse (et chevaux)***

b. ***Souris à chevaux (et carrosse)***

c. ***Si la mention initiale comprend la citrouille et les souris, elle ne doit pas nécessairement comprendre les deux éléments après la transformation pour obtenir un crédit complet, et un seul doit être exact.***

d. ***Ne retirez pas de points pour la mention d'autres transformations, comme le chien à cocher, car celles-ci ne sont pas incorrectes, elles n'ont simplement pas atteint une fréquence significative.***

†† 16) ***<sup>1</sup>La fée marraine <sup>2</sup>fait de <sup>3</sup>Cendrillon <sup>4</sup>une belle princesse.***

1. ***Voir 14.1***

2. ***Transforme, crée, change, donne***

3. ***La fille ordinaire, ses vêtements ordinaires***

4. ***Robe/chaussures en robe de bal/chaussons, belle***

- ++ 17) **<sup>1</sup>Cendrillon <sup>2</sup>est allée <sup>3</sup>au bal** en carrosse.
1. **Elle**
  2. **Va, arrive**
  3. **Voir 7.2**
- ++ 18) Elle savait **<sup>1</sup>qu'elle <sup>2</sup>devait être <sup>3</sup>à la maison à minuit** parce que tout va se retransformer à minuit.
1. **Cendrillon**
  2. **Doit être, doit revenir**
  3. **Partir avant minuit**
- Note : Une alternative pourrait être "La fée marraine lui a dit que si elle n'était pas rentrée à minuit, XXX arriverait" ou quelque chose de similaire.
- ++ 19) **<sup>1</sup>Le prince et Cendrillon <sup>2</sup>ont dansé** dans la salle / toute la nuit / ensemble.
1. **Ils**
  2. **Dansaient, continuaient à danser**
- 20) **<sup>1</sup>Le prince <sup>2</sup>tombe amoureux <sup>3</sup>de Cendrillon.**
1. **Il**
  2. **Est amoureux de, est ravi de, est impressionné par, aime, est accroché à**
  3. **Elle**
- Note : Si l'énoncé est " Prince / Ils tombent amoureux au premier regard ", le crédit ne peut être entièrement attribué que si Cendrillon a été mentionnée auparavant ou si le référent de "ils" est clairement identifié.
- ++ 21) Cendrillon a réalisé **<sup>1</sup>il <sup>2</sup>est <sup>3</sup>minuit.**
1. **L'horloge, quelque chose indique qu'il**
  2. **Devient, sonne, frappe**
  3. **Douze heures, minuit, presque minuit, les douze coups de minuit**
- ++ 22) **<sup>1</sup>Elle <sup>2</sup>a descendu <sup>3</sup>les escaliers.**
1. **Voir 18.1**
  2. **Courait, se précipitait, sprintait, quittait, partait.**
  3. **Hors du bal/château, loin du bal/château/prince.**
- ++ 23) En courant dans les escaliers, **<sup>1</sup>elle <sup>2</sup>a perdu une de ses <sup>3</sup>pantoufles de verre.**
1. **Voir 18.1**
  2. **Laisse**
  3. **Chaussures, chaussure de verre**
- 24) **<sup>1</sup>Le prince <sup>2</sup>trouve <sup>3</sup>la chaussure de Cendrillon.**
1. **Tout autre personnage royal, roi, serviteur, duc, premier ministre, chambellan, majordome**
  2. **Avait, a eu, a récupéré, a été apporté**
  3. **Voir 23.3**
- Note : Une formulation alternative est "Le serviteur apporte la pantoufle au prince".

- 25) <sup>1</sup>Tout <sup>2</sup>retourne <sup>3</sup>à sa forme originale.
1. **La citrouille, les souris, et/ou les vêtements/la robe.**
  2. **Revient, disparaît**
    - i. **Si le locuteur utilise " disparaît ", il n'a pas besoin de préciser ce qui disparaît, par exemple : " Tout disparaît. "**
  3. **Devient normal (peut préciser ce en quoi il redevient)**
- † 26) <sup>1</sup>Elle <sup>2</sup>est rentrée <sup>3</sup>à la maison à temps.
1. **Voir 18.1**
  2. **Arrive, va**
  3. **Chez elle**
- †† 27) <sup>1</sup>Le prince <sup>2</sup>cherche de porte en porte <sup>3</sup>pour trouver Cendrillon.
1. **Voir 24.1, le serviteur**
  2. **Essayait de trouver, fait du porte à porte**
  3. **La personne à qui ferait la pantoufle de verre, la fille du bal**
- Note : On pourrait aussi dire : "Le prince/son serviteur essayait la pantoufle sur toutes les filles".
- 28) <sup>1</sup>Le prince <sup>2</sup>vient <sup>3</sup>à la maison de Cendrillon.
1. **Voir 27.1**
  2. **Arrive à, est allé, a trouvé, se présente à**
  3. **Sa maison**
- 29) <sup>1</sup>Les demi-sœurs <sup>2</sup>essayent <sup>3</sup>la pantoufle de verre.
1. **Les demi-sœurs et la belle-mère, les autres filles (si la référence aux demi-sœurs est claire), etc.**
    - i. **Pour ce concept, les locuteurs peuvent inclure la belle-mère. Cependant, la belle-mère mentionnée seule n'est pas suffisante.**
  2. **Tentent d'enfiler, mettent le pied dans**
  3. **Voir 23.3**
- 30) <sup>1</sup>La pantoufle <sup>2</sup>ne faisait pas <sup>3</sup>aux demi-sœurs.
1. **Voir 23.3**
  2. **N'allait pas sur les pieds de, ne convenait pas à**
  3. **Voir 29.1**
- 31) <sup>1</sup>Il <sup>2</sup>a mis <sup>3</sup>la pantoufle au pied de Cendrillon.
1. **Voir 27.1**
  2. **Essayé, glissé, glissé, placé**
  3. **Voir 23.3**
- Note 1 : Bien que la plupart ne mentionnent pas spécifiquement Cendrillon dans ces concepts (31, 32), il est clair qu'à ce moment de l'histoire, ils font référence à Cendrillon.
- Note 2 : Une autre façon de dire ceci est "Cendrillon a essayé la pantoufle".
- †† 32) <sup>1</sup>La pantoufle <sup>2</sup>convient parfaitement à Cendrillon.
1. **Voir 23.3**
  2. **Appartenait à, allait**
- Note : Une autre façon de dire ceci est "La chaussure a glissé facilement sur son pied" ou "La pantoufle était celle de Cendrillon".

†† 33) ***<sup>1</sup>Cendrillon et le prince <sup>2</sup>se sont mariés.***

***1. Voir 19.1***

***2. Ont été mariés, ont eu un mariage, ont eu une célébration de mariage***

Note : Une autre façon de dire ceci est : "Le prince a pris Cendrillon comme épouse".

†† 34) ***<sup>1</sup>Cendrillon et le prince <sup>2</sup>vécurent heureux pour toujours/et eurent beaucoup d'enfants.***

***1. Voir 19.1***

***i. Le locuteur doit inclure ou faire référence à la fois à Cendrillon et au prince afin de recevoir un score « accurate and complete ».***

***2. Vivaient pour toujours, vivaient longtemps, étaient heureux pour la vie***

***i. Le locuteur doit indiquer une longue période de temps afin de recevoir un score « accurate and complete ». Par exemple, "pour toujours", "pour toujours", "longtemps", "vie", etc.***

Note: les variantes peuvent inclure " Ils vécurent heureux jusqu'à la fin des temps ", " Ils furent ensemble pour toujours ", " Ils eurent une vie merveilleuse ".

† Indique les concepts produits par 50 % de l'échantillon.

†† Indique les concepts produits par 66 % de l'échantillon.

Traduit avec [www.DeepL.com/Translator](http://www.DeepL.com/Translator) (version gratuite) révisé par A.B., C.J. et K.M.
